# Supplementary material for: Long-Term Outcomes of Patients with Unprotected Left Main Coronary Artery Disease Treated with Percutaneous Angioplasty versus Bypass Grafting: A Meta-Analysis of Randomized Controlled Trials
Source: MDPI journal article supplement (doi:10.3390/jcm9072231), 2020-07-14

Supplementary Table 1. Qualitative assessment of study reporting

| <b>Domain</b>         | <b>Questions</b>                                                                                                           | <b>Judgments</b>   |
|-----------------------|----------------------------------------------------------------------------------------------------------------------------|--------------------|
| <b>Risk of bias</b>   |                                                                                                                            |                    |
| 1) Patient selection  | <i>Was a consecutive or random sample of patients enrolled?</i>                                                            | Yes, No, Unclear   |
|                       | <i>Was a case-control design avoided?</i>                                                                                  | Yes, No, Unclear   |
|                       | <i>Did the study avoid inappropriate exclusions?</i>                                                                       | Yes, No, Unclear   |
|                       | <i>Could the selection of patients have introduced bias?</i>                                                               | Low, High, Unclear |
| <b>Applicability</b>  | <i>Is there concern that the included patients do not match the review questions?</i>                                      | Low, High, Unclear |
| 1) Patient selection  |                                                                                                                            |                    |
| <b>Risk of bias</b>   |                                                                                                                            |                    |
| 2) Index test         | <i>Were the index test results interpreted without knowledge of the results of the reference standard?</i>                 | Yes, No, Unclear   |
|                       | <i>If a threshold was used, was it pre-specified?</i>                                                                      | Yes, No, Unclear   |
|                       | <i>Could the conduct or interpretation of the index test have introduced bias?</i>                                         | Low, High, Unclear |
| <b>Applicability</b>  | <i>Is there concern that the index test, its conduct, or interpretation differ from the review question?</i>               | Low, High, Unclear |
| 2) Index test         |                                                                                                                            |                    |
| <b>Risk of bias</b>   |                                                                                                                            |                    |
| 3) Reference standard | <i>Is the reference standard likely to correctly classify the target condition?</i>                                        | Yes, No, Unclear   |
|                       | <i>Were the reference standard results interpreted without knowledge of the results of the index test?</i>                 | Yes, No, Unclear   |
|                       | <i>Could the reference standard, its conduct, or its interpretation have introduced bias?</i>                              | Yes, No, Unclear   |
|                       |                                                                                                                            | Low, High, Unclear |
| <b>Applicability</b>  | <i>Is there concern that the target condition as defined by the reference standard does not match the review question?</i> | Low, High, Unclear |
| 3) Reference standard |                                                                                                                            |                    |
| <b>Risk of bias</b>   |                                                                                                                            |                    |
| 4) Flow and timing    | <i>Was there an appropriate interval between index test(s) and reference standard?</i>                                     | Yes, No, Unclear   |

|                                                          |                    |
|----------------------------------------------------------|--------------------|
| <i>Did all patients receive a reference standard?</i>    | Yes, No, Unclear   |
| <i>Did patients receive the same reference standard?</i> | Yes, No, Unclear   |
| <i>Were all patients included in the analysis?</i>       | Yes, No, Unclear   |
| <i>Could the patient flow have introduced bias?</i>      | Low, High, Unclear |

---

Supplementary Table 2. Summary of QUADAS-2 Assessment of Selected Studies

| Author<br>(year)<br>reference | Risk of bias          |               |                       |                    | Applicability concerns |               |                       |
|-------------------------------|-----------------------|---------------|-----------------------|--------------------|------------------------|---------------|-----------------------|
|                               | Patients<br>selection | Index<br>test | Reference<br>standard | Flow and<br>timing | Patients<br>selection  | Index<br>test | Reference<br>standard |
| EXCEL (2019)                  | Low                   | Low           | Low                   | Low                | Low                    | Low           | Low                   |
| LE MANS (2016)                | Low                   | Low           | Low                   | Unclear            | Low                    | Low           | Low                   |
| NOBLE (2019)                  | Low                   | Low           | Low                   | Low                | Low                    | Low           | Low                   |
| PRECOMBAT (2020)              | Low                   | Low           | Low                   | Unclear            | Low                    | Low           | Low                   |
| SYNTAX (2019)                 | Low                   | Low           | Low                   | Low                | Low                    | Low           | Low                   |

QUADAS-2: Quality Assessment of Diagnostic Accuracy Studies-2.

Supplementary Figure 1. Risk of bias

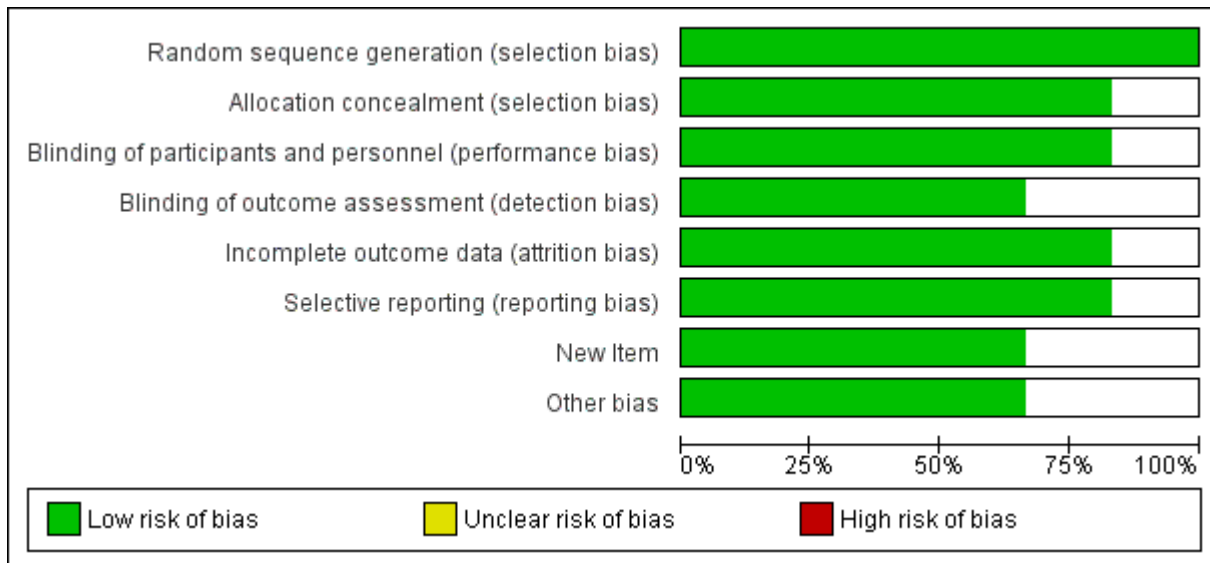

Supplement: s1 [file s1]
